# Supplementary material for: Comparison of the 7th and 8th Edition of the UICC/AJCC TNM Staging System in Primary Resected Squamous Cell Carcinomas of the Lung—A Single Center Analysis of 354 Cases
Source: Front Med (Lausanne). 2019 Sep 4;6:196. doi: 10.3389/fmed.2019.00196 (PMC6737333; doi:10.3389/fmed.2019.00196)
Supplement: Table S1 — Complete data on the patient cohort (N = 354). [file Table_1.XLSX]

## Sheet: Tabelle1
Patient ID	gender	Age at operation (years)	tumor size (mm)	pT (TNM7)	pT (TNM8)	pN	M	Stage (TNM7)	Stage (TNM8)	R	OS status (0=no event; 1=event)	OS (months)	TTR status (0=no event; 1=event)	TTR (months)	PFS status (0=no event; 1=event)	PFS (months)	DSS status (0=no event; 1=event)	DSS (months)	cause of death
1	m	53.6917	8	pT1a	pT1a	pN0	M0	IA	IA1	R0	1	83.1333	0	83.1333	1	83.1333	0	83.1333	non-tumor
2	m	63.3361	9	pT1a	pT1a	pN1	M0	IIA	IIB	R0	0	161.467			0	161.467		161.467
3	m	59.6111	9	pT1a	pT1a	pN0	M0	IA	IA1	R0	0	3.7			0	3.7	0	3.7
4	m	55.7472	10	pT1a	pT1a	pN1	M0	IIA	IIB	R0	1	12.4667	0	12.4667	1	12.4667	0	12.4667	non-tumor
5	m	65.7194	10	pT1a	pT1a	pN0	M0	IA	IA1	R0	0	142.7	0	142.7	0	142.7	0	142.7
6	m	68.25	10	pT1a	pT1a	pN0	M0	IA	IA1	R0	0	87.0333	0	87.0333	0	87.0333	0	87.0333
7	m	67.1944	12	pT1a	pT1b	pN0	M0	IA	IA2	R0	0	21.7667			0	21.7667	0	21.7667
8	m	68.0222	12	pT1a	pT1b	pN0	M0	IA	IA2	R0	1	56.2667	1	56.0333	1	56.0333	1	56.2667	tumor
9	m	75.2111	13	pT1a	pT1b	pN0	M0	IA	IA2	R0
10	m	60.8139	14	pT1a	pT1b	pN0	M0	IA	IA2	R0	0	82.4333	1	66.2667	1	66.2667	0	82.4333
11	m	71.675	14	pT1a	pT1b	pN1	M0	IIA	IIB	R0	1	86.3	1	9.6	1	9.6	1	86.3	tumor
12	f	61.7583	15	pT1a	pT1b	pN0	M0	IA	IA2	R0
13	m	61.5194	15	pT1a	pT1b	pN1	M0	IIA	IIB	R0	1	95.0667	0	95.0667	1	95.0667	0	95.0667	non-tumor
14	f	76.2444	15	pT1a	pT1b	pN0	M0	IA	IA2	R0	0	87.5333	0	87.5333	0	87.5333	0	87.5333
15	f	74.7556	15	pT1a	pT1b	pN0	M0	IA	IA2	R0	0	46.3667	0	46.3667	0	46.3667	0	46.3667
16	m	69.4	16	pT1a	pT1b	pN0	M0	IA	IA2	R0
17	m	70.6861	16	pT1a	pT1b	pN0	M0	IA	IA2	R0	1	75.5	0	75.5	1	75.5	0	75.5	non-tumor
18	m	70.4694	16	pT1a	pT1b	pN0	M0	IA	IA2	R0	0	86.0667			0	86.0667	0	86.0667
19	m	68.5806	17	pT1a	pT1b	pN0	M0	IA	IA2	R0	1	0.533333			1	0.533333	0	0.533333	Operation-associated
20	m	72.6889	17	pT1a	pT1b	pN1	M0	IIA	IIB	R0	0	77.0667	0	77.0667	0	77.0667	0	77.0667
21	f	70.2806	18	pT1a	pT1b	pN0	M0	IA	IA2	R0
22	f	71.7917	18	pT1a	pT1b	pN0	M0	IA	IA2	R0	0	38.3	0	38.3	0	38.3	0	38.3
23	m	65.5944	19	pT1a	pT1b	pN0	M0	IA	IA2	R0
24	m	60.0528	19	pT1a	pT1b	pN0	M0	IA	IA2	R0	0	67.6667	0	67.6667	0	67.6667	0	67.6667
25	m	74.7	20	pT1a	pT1b	pN0	M0	IA	IA2	R0
26	m	75.3333	20	pT1a	pT1b	pN0	M0	IA	IA2	R0
27	m	68.5917	20	pT1a	pT1b	pN0	M0	IA	IA2	R0
28	f	57.8611	20	pT1a	pT1b	pN0	M0	IA	IA2	R0	0	68.8333	1	68.8333	1	68.8333	0	68.8333
29	m	67.0167	20	pT1a	pT1b	pN2	M0	IIIA	IIIA	R1	1	18.8667	1	8.73333	1	8.73333	0	18.8667	non-tumor
30	f	77.6528	20	pT1a	pT1b	pN0	M0	IA	IA2	R0
31	m	83.8611	20	pT1a	pT1b	pN0	M0	IA	IA2	R0
32	m	67.6444	20	pT1a	pT1b	pN1	M0	IIA	IIB	R0	0	75.8	0	75.8	0	75.8	0	75.8
33	m	62.1556	20	pT1b	pT1c	pN1	M0	IIA	IIB	R1	0	69.0333	0	69.0333	0	69.0333	0	69.0333
34	m	63.4583	21	pT1b	pT1c	pN1	M0	IIA	IIB	R0	0	50.9	0	50.9	0	50.9	0	50.9
35	m	74.1917	22	pT1b	pT1c	pN0	M0	IA	IA3	R0
36	m	78.1917	22	pT1b	pT1c	pN0	M0	IA	IA3	R0
37	m	73.6444	22	pT1b	pT1c	pN0	M0	IA	IA3	R0
38	f	72.6583	22	pT1b	pT1c	pN0	M0	IA	IA3	R0	1	47.0667	0	47.0667	1	47.0667	0	47.0667	non-tumor
39	m	64.1639	22	pT1b	pT1c	pN0	M0	IA	IA3	R0	0	10.0333	0	10.0333	0	10.0333	0	10.0333
40	m	69.0639	22	pT1b	pT1c	pN0	M0	IA	IA3	R0	1	62.5333	0	62.5333	1	62.5333	0	62.5333	unknown
41	m	75.7306	23	pT1b	pT1c	pN1	M0	IIA	IIB	R0	1	41.4333	0	41.4333	1	41.4333	0	41.4333	non-tumor
42	m	77.1306	24	pT1b	pT1c	pN0	M0	IA	IA3	R0	1	0.433333			1	0.433333	0	0.433333	Operation-associated
43	m	51.2806	25	pT1b	pT1c	pN2	M0	IIIA	IIIA	R0	1	106.7	1	77.1	1	77.1	1	106.7	tumor
44	m	69.8389	25	pT1b	pT1c	pN0	M0	IA	IA3	R0	1	0.1	0	0.1	1	0.1	0	0.1	unknown
45	m	63.8306	25	pT1b	pT1c	pN0	M0	IA	IA3	R0
46	m	53.8444	25	pT1b	pT1c	pN1	M0	IIA	IIB	R0	0	5.66667			0	5.66667	0	5.66667
47	m	52.05	25	pT1b	pT1c	pN1	M0	IIA	IIB	R0	0	127.667	0	127.667	0	127.667	0	127.667
48	m	73.3472	25	pT1b	pT1c	pN0	M1	IV	IVA	R0	1	7.5			1	7.5	1	7.5	tumor
49	f	67.3472	25	pT1b	pT1c	pN1	M0	IIA	IIB	R0	0	124.767	0	124.767	0	124.767	0	124.767
50	m	68.3	25	pT1b	pT1c	pN0	M0	IA	IA3	R0	1	63.9667	0	63.9667	1	63.9667	0	63.9667	non-tumor
51	m	69.1944	25	pT1b	pT1c	pN0	M0	IA	IA3	R0	0	103.4	0	103.4	0	103.4	0	103.4
52	m	80.8361	25	pT1b	pT1c	pN0	M0	IA	IA3	R0
53	m	79.2667	25	pT1b	pT1c	pN1	M0	IIA	IIB	R0
54	m	65.6889	25	pT1b	pT1c	pN0	M0	IA	IA3	R0	1	33.7333	0	33.7333	1	33.7333	0	33.7333	non-tumor
55	m	65.0389	25	pT1b	pT1c	pN0	M0	IA	IA3	R0	0	43.9			0	43.9	0	43.9
56	m	75.0528	25	pT1b	pT1c	pN0	M0	IA	IA3	R0	0	57.3333	0	57.3333	0	57.3333	0	57.3333
57	m	75.4028	25	pT1b	pT1c	pN0	M0	IA	IA3	R0	0	52.1333	0	52.1333	0	52.1333	0	52.1333
58	f	74.025	27	pT1b	pT1c	pN0	M0	IA	IA3	R0	0	67.2333	0	67.2333	0	67.2333	0	67.2333
59	m	82.6167	27	pT1b	pT1c	pN0	M0	IA	IA3	R0	0	68.3667	0	68.3667	0	68.3667	0	68.3667
60	m	65.8306	27	pT1b	pT1c	pN0	M0	IA	IA3	R0	0	38.9667	0	38.9667	0	38.9667	0	38.9667
61	f	79.5694	27	pT1b	pT1c	pN0	M0	IA	IA3	R0	0	36.5667	0	36.5667	0	36.5667	0	36.5667
62	m	76.9889	28	pT1b	pT1c	pN2	M0	IIIA	IIIA	R1	1	13.7333	0	13.7333	1	13.7333	0	13.7333	non-tumor
63	m	78.4361	29	pT1b	pT1c	pN0	M0	IA	IA3	R0	0	41.9	0	41.9	0	41.9	0	41.9
64	m	71.2694	30	pT1b	pT1c	pN1	M0	IIA	IIB	R0	1	111.233	0	111.233	1	111.233	0	111.233	non-tumor
65	f	68.1556	30	pT1b	pT1c	pN0	M0	IA	IA3	R0	1	139.133	0	139.133	1	139.133	0	139.133	non-tumor
66	m	65.5556	30	pT1b	pT1c	pN0	M0	IA	IA3	R0	0	134	0	134	0	134		134
67	f	75.7361	30	pT1b	pT1c	pN0	M0	IA	IA3	R0	1	136.767	1	50.7667	1	50.7667	0	136.767	non-tumor
68	m	67.1778	30	pT1b	pT1c	pN0	M0	IA	IA3	R0
69	m	64.1917	30	pT1b	pT1c	pN1	M0	IIA	IIB	R0	0	35.5333			1	6.53	0	35.5333
70	m	64.7694	30	pT1b	pT1c	pN1	M0	IIA	IIB	R1	1	0.433333			1	0.433333	0	0.433333	Operation-associated
71	m	71.1944	30	pT1b	pT1c	pN0	M0	IA	IA3	R0	0	100.367	0	100.367	0	100.367	0	100.367
72	m	76.2778	30	pT1b	pT1c	pN0	M0	IA	IA3	R0
73	m	67.8972	30	pT1b	pT1c	pN0	M0	IA	IA3	R0	0	98.0667	0	98.0667	0	98.0667	0	98.0667
74	m	76.4083	30	pT1b	pT1c	pN0	M0	IA	IA3	R0
75	f	80.0417	30	pT1b	pT1c	pN0	M0	IA	IA3	R0
76	m	63.5083	30	pT1b	pT1c	pN2	M0	IIIA	IIIA	R1	1	64.8333	0	64.8333	1	64.8333	0	64.8333	non-tumor
77	m	76.025	30	pT1b	pT1c	pN0	M0	IA	IA3	R0	0	53.6	0	53.6	0	53.6	0	53.6
78	m	77.3694	30	pT1b	pT1c	pN0	M0	IA	IA3	R0	1	9.6	0	9.6	1	9.6	0	9.6	non-tumor
79	m	82.9917	30	pT1b	pT1c	pN0	M0	IA	IA3	R0	1	22.2333	1	19.5667	1	19.5667	1	22.2333	tumor
80	m	62.9056	30	pT1b	pT1c	pN0	M0	IA	IA3	R0	0	48.0667	0	48.0667	0	48.0667	0	48.0667
81	m	75.3917	13	pT2a	pT2a	pN0	M0	IB	IB	R0	1	73.4667	0	73.4667	1	73.4667	0	73.4667	non-tumor
82	m	75.4056	14	pT2a	pT2a	pN0	M0	IB	IB	R0	0	47.2	0	47.2	0	47.2	0	47.2
83	f	74.1194	17	pT2a	pT2a	pN0	M0	IB	IB	R0
84	m	79.2722	19	pT2a	pT2a	pN0	M0	IB	IB	R0	0	45.4667	0	45.4667	0	45.4667	0	45.4667
85	f	69.5	20	pT2a	pT2a	pN0	M0	IB	IB	R0
86	f	65.5611	20	pT2a	pT2a	pN0	M0	IB	IB	R0	0	98	0	98	0	98	0	98
87	f	71.1167	22	pT2a	pT2a	pN0	M0	IB	IB	R0	1	65.6	0	65.6	1	65.6	0	65.6	non-tumor
88	m	74.8111	23	pT2a	pT2a	pN0	M0	IB	IB	R0
89	m	49.8528	25	pT2a	pT2a	pN1	M0	IIA	IIB	R0	1	61.3333	0	61.3333	1	61.3333	0	61.3333	non-tumor
90	m	81.6306	25	pT2a	pT2a	pN0	M0	IB	IB	R0	1	22.5	0	22.5	1	22.5	0	22.5	non-tumor
91	f	67.0194	25	pT2a	pT2a	pN1	M0	IIA	IIB	R0	0	53.8667	0	53.8667	0	53.8667	0	53.8667
92	m	67.7583	28	pT2a	pT2a	pN0	M0	IB	IB	R0	0	37.5	0	37.5	0	37.5	0	37.5
93	m	61.6389	29	pT2a	pT2a	pN0	M0	IB	IB	R0	0	90.5333	0	90.5333	0	90.5333	0	90.5333
94	m	70.0306	30	pT2a	pT2a	pN0	M0	IB	IB	R0
95	m	65.8861	30	pT2a	pT2a	pN0	M0	IB	IB	R0
96	m	60.9722	30	pT2a	pT2a	pN0	M0	IB	IB	R1	1	0.1			1	0.1	0	0.1	Operation-associated
97	m	74.1056	30	pT2a	pT2a	pN0	M0	IB	IB	R0	1	108.2	0	108.2	1	108.2	0	108.2	non-tumor
98	m	80.1889	30	pT2a	pT2a	pN2	M0	IIIA	IIIA	R0	1	0.133333			1	0.133333	0	0.133333	Operation-associated
99	m	77.8556	31	pT2a	pT2a	pN0	M0	IB	IB	R0	0	28.9333	1	28.4333	1	28.4333	0	28.9333
100	f	76.1583	31	pT2a	pT2a	pN0	M0	IB	IB	R0	1	14.2667	1	14.2667	1	14.2667	1	14.2667	tumor
101	m	68.0889	31	pT2a	pT2a	pN1	M0	IIA	IIB	R1	1	57.2	0	57.2	1	57.2	0	57.2	non-tumor
102	m	44.9472	31	pT2a	pT2a	pN1	M0	IIA	IIB	R0	0	40.0667	1	31.2	1	31.2	0	40.0667
103	m	71.8	31	pT2a	pT2a	pN1	M0	IIA	IIB	R0	0	10.6333	0	10.6333	0	10.6333	0	10.6333
104	f	75.4028	32	pT2a	pT2a	pN1	M0	IIA	IIB	R0
105	m	58.4417	32	pT2a	pT2a	pN0	M0	IB	IB	R0	1	106.2	0	106.2	1	106.2	0	106.2	non-tumor
106	m	75.1944	33	pT2a	pT2a	pN0	M0	IB	IB	R0	1	50.8333	0	50.8333	1	50.8333	0	50.8333	non-tumor
107	m	60.3833	33	pT2a	pT2a	pN0	M0	IB	IB	R0	0	66.9667	0	66.9667	0	66.9667	0	66.9667
108	m	67.2333	34	pT2a	pT2a	pN0	M0	IB	IB	R0	0	108.267			0	108.267		108.267
109	m	63.6889	34	pT2a	pT2a	pN1	M0	IIA	IIB	R0	1	87.3	0	87.3	1	87.3	0	87.3	non-tumor
110	m	72.3194	35	pT2a	pT2a	pN0	M0	IB	IB	R0
111	m	57.2278	35	pT2a	pT2a	pN0	M0	IB	IB	R0
112	m	65.05	35	pT2a	pT2a	pN0	M0	IB	IB	R0	1	181.333			1	181.333	0	181.333	unknown
113	f	68.6694	35	pT2a	pT2a	pN1	M0	IIA	IIB	R0	1	149.967	1	145.367	1	145.367	1	149.967	tumor
114	m	67.1917	35	pT2a	pT2a	pN1	M0	IIA	IIB	R0
115	f	75.7417	35	pT2a	pT2a	pN0	M0	IB	IB	R0	0	23.4333	1	23.4333	1	23.4333	0	23.4333
116	m	85.0667	35	pT2a	pT2a	pN1	M0	IIA	IIB	R0	1	23.4333			1	23.4333	0	23.4333	unknown
117	m	81.6611	35	pT2a	pT2a	pN0	M0	IB	IB	R0
118	m	82.0194	35	pT2a	pT2a	pN0	M0	IB	IB	R0	0	12.8333	1	12.8333	1	12.8333	0	12.8333
119	m	57.7639	35	pT2a	pT2a	pN0	M1	IV	IVA	R0	0	12.1	1	9.76667	1	9.76667	0	12.1
120	m	61.1972	35	pT2a	pT2a	pN0	M0	IB	IB	R0	1	85.5667	0	85.5667	1	85.5667	0	85.5667	non-tumor
121	m	73.0778	35	pT2a	pT2a	pN0	M0	IB	IB	R0	1	58.3667	1	36.1	1	36.1	1	58.3667	tumor
122	m	75.975	35	pT2a	pT2a	pN0	M0	IB	IB	R0	1	43.5333	0	43.5333	1	43.5333	0	43.5333	non-tumor
123	m	78.475	35	pT2a	pT2a	pN0	M0	IB	IB	R0
124	m	52.6278	35	pT2a	pT2a	pN1	M0	IIA	IIB	R0	0	84.0667	0	84.0667	0	84.0667	0	84.0667
125	m	48.35	35	pT2a	pT2a	pN1	M0	IIA	IIB	R0	0	46.1333	0	46.1333	0	46.1333	0	46.1333
126	f	59.75	35	pT2a	pT2a	pN0	M0	IB	IB	R0	0	41.5	0	41.5	0	41.5	0	41.5
127	f	76.0389	36	pT2a	pT2a	pN0	M0	IB	IB	R0	0	40.2333			0	40.2333	0	40.2333
128	m	83.2194	38	pT2a	pT2a	pN0	M0	IB	IB	R0	0	85.2333			0	85.2333		85.2333
129	m	78.0083	40	pT2a	pT2a	pN0	M0	IB	IB	R0
130	m	80.2417	40	pT2a	pT2a	pN1	M0	IIA	IIB	R0
131	m	67.325	40	pT2a	pT2a	pN0	M0	IB	IB	R0
132	m	72.1806	40	pT2a	pT2a	pN1	M0	IIA	IIB	R0	1	87.4667	0	87.4667	1	87.4667	0	87.4667	non-tumor
133	m	66.2306	40	pT2a	pT2a	pN0	M0	IB	IB	R1	1	29.9	1	21.8667	1	21.8667	1	29.9	tumor
134	m	43.8444	40	pT2a	pT2a	pN1	M0	IIA	IIB	R0
135	m	74.1028	40	pT2a	pT2a	pN0	M0	IB	IB	R0	0	23.1	1	23.1	1	23.1		23.1
136	m	71.0306	40	pT2a	pT2a	pN0	M0	IB	IB	R0
137	m	75.5611	40	pT2a	pT2a	pN0	M0	IB	IB	R0	0	122.3	0	122.3	0	122.3		122.3
138	m	70.8667	40	pT2a	pT2a	pN0	M0	IB	IB	R0
139	m	72.9028	40	pT2a	pT2a	pN0	M0	IB	IB	R0	1	0.166667			1	0.166667	0	0.166667	Operation-associated
140	m	63.9639	40	pT2a	pT2a	pN0	M0	IB	IB	R0	1	102.567	0	102.567	1	102.567	0	102.567	non-tumor
141	m	74.375	40	pT2a	pT2a	pN0	M0	IB	IB	R0	0	18.6333	1	18.6333	1	18.6333	0	18.6333
142	f	78.825	40	pT2a	pT2a	pN0	M0	IB	IB	R0	1	0.533333			1	0.533333	0	0.533333	Operation-associated
143	m	47.1361	40	pT2a	pT2a	pN0	M0	IB	IB	R0	0	83.9	0	83.9	0	83.9	0	83.9
144	m	66.225	42	pT2a	pT2a	pN1	M0	IIA	IIB	R0	0	47.0667	0	47.0667	0	47.0667	0	47.0667
145	f	55.4361	45	pT2a	pT2a	pN0	M0	IB	IB	R0	0	76.0667	0	76.0667	0	76.0667	0	76.0667
146	m	79.0667	40	pT2a	pT2b	pN0	M0	IB	IIA	R0	0	40.5	0	40.5	0	40.5	0	40.5
147	m	77.8306	41	pT2a	pT2b	pN0	M0	IB	IIA	R0
148	m	65.3806	41	pT2a	pT2b	pN0	M0	IB	IIA	R0	0	77.8667	1	23.7333	1	23.7333	0	77.8667
149	m	68.7194	42	pT2a	pT2b	pN0	M0	IB	IIA	R0
150	f	71.0194	42	pT2a	pT2b	pN1	M0	IIA	IIB	R0	1	17.4667	0	17.4667	1	17.4667	0	17.4667	non-tumor
151	m	66.0722	42	pT2a	pT2b	pN0	M0	IB	IIA	R0	1	144.733	1	101.3	1	101.3	1	144.733	tumor
152	m	71.7444	42	pT2a	pT2b	pN0	M0	IB	IIA	R0	1	19.7	0	19.7	1	19.7	0	19.7	non-tumor
153	m	80.6583	42	pT2a	pT2b	pN0	M0	IB	IIA	R0	1	28.0667	1	26.8333	1	26.8333	1	28.0667	tumor
154	m	65.0806	42	pT2a	pT2b	pN1	M0	IIA	IIB	R0	1	14.1667	1	7.9	1	7.9	1	14.1667	tumor
155	m	65.5667	43	pT2a	pT2b	pN0	M0	IB	IIA	R0	1	10.3667	0	10.3667	1	10.3667	0	10.3667	non-tumor
156	m	66.6222	43	pT2a	pT2b	pN1	M0	IIA	IIB	R0	0	43.1333	0	43.1333	0	43.1333	0	43.1333
157	m	72.1583	45	pT2a	pT2b	pN0	M0	IB	IIA	R0	1	41.6333			1	41.6333	0	41.6333	unknown
158	m	66.8861	45	pT2a	pT2b	pN0	M0	IB	IIA	R0
159	m	63.775	45	pT2a	pT2b	pN0	M0	IB	IIA	R0	1	57.5667	1	30.0667	1	30.0667	1	57.5667	tumor
160	m	75.6139	45	pT2a	pT2b	pN1	M0	IIA	IIB	R1
161	m	77.2778	45	pT2a	pT2b	pN1	M0	IIA	IIB	R0
162	m	57.4917	45	pT2a	pT2b	pN0	M0	IB	IIA	R0
163	m	74.0861	45	pT2a	pT2b	pN0	M0	IB	IIA	R0	1	19.7667	1	19.3	1	19.3	1	19.7667	tumor
164	m	73.9333	45	pT2a	pT2b	pN0	M0	IB	IIA	R0	0	8.9			0	8.9		8.9
165	m	77.4444	45	pT2a	pT2b	pN2	M0	IIIA	IIIA	R0	0	84.2333	0	84.2333	0	84.2333		84.2333
166	m	66.8528	45	pT2a	pT2b	pN0	M0	IB	IIA	R0	0	67.7333	0	67.7333	0	67.7333	0	67.7333
167	m	62.0722	45	pT2a	pT2b	pN0	M0	IB	IIA	R0	1	134.6	0	134.6	1	134.6	0	134.6	unknown
168	m	50.7833	45	pT2a	pT2b	pN0	M0	IB	IIA	R0	1	92.5667	1	84.6	1	84.6	1	92.5667	tumor
169	m	69.5028	45	pT2a	pT2b	pN0	M0	IB	IIA	R0	1	0.2			1	0.2	0	0.2	Operation-associated
170	m	77.5694	45	pT2a	pT2b	pN0	M0	IB	IIA	R0	1	1.3	0	1.3	1	1.3	0	1.3	unknown
171	f	72.4111	45	pT2a	pT2b	pN0	M0	IB	IIA	R0	1	1.16667			1	1.16667	0	1.16667	Operation-associated
172	m	70.6028	45	pT2a	pT2b	pN0	M0	IB	IIA	R0	0	68.3			0	68.3	0	68.3
173	m	77.2139	47	pT2a	pT2b	pN2	M0	IIIA	IIIA	R0	1	18.1333	1	18.1333	1	18.1333	1	18.1333	tumor
174	m	69.4778	47	pT2a	pT2b	pN1	M0	IIA	IIB	R0	0	71.8	0	71.8	0	71.8	0	71.8
175	f	70.9222	48	pT2a	pT2b	pN0	M0	IB	IIA	R0	0	46.9	0	46.9	0	46.9	0	46.9
176	m	54.4583	50	pT2a	pT2b	pN1	M0	IIA	IIB	R0	0	134.667	1	25.2	1	25.2	0	134.667
177	m	44.4778	50	pT2a	pT2b	pN2	M0	IIIA	IIIA	R0	1	40.7667	1	18.6333	1	18.6333	1	40.7667	tumor
178	m	72.9806	50	pT2a	pT2b	pN0	M0	IB	IIA	R0
179	m	55.0389	50	pT2a	pT2b	pN1	M0	IIA	IIB	R0	0	157.667	0	157.667	0	157.667		157.667
180	m	78.7222	50	pT2a	pT2b	pN0	M0	IB	IIA	R0	1	0.866667			1	0.866667	0	0.866667	Operation-associated
181	m	68.8639	50	pT2a	pT2b	pN2	M0	IIIA	IIIA	R0	1	10.9333	1	5.86667	1	5.86667	1	10.9333	tumor
182	m	65.4194	50	pT2a	pT2b	pN1	M0	IIA	IIB	R0	1	6.36667	1	2.4	1	2.4	0	6.36667	non-tumor
183	m	78.0333	50	pT2a	pT2b	pN1	M0	IIA	IIB	R0	1	0.6			1	0.6	0	0.6	Operation-associated
184	m	65.875	50	pT2a	pT2b	pN1	M0	IIA	IIB	R0	1	1.36667			1	1.36667	0	1.36667	Operation-associated
185	f	67.3639	50	pT2a	pT2b	pN0	M0	IB	IIA	R0	0	45.4			0	45.4	0	45.4
186	m	84.5361	50	pT2a	pT2b	pN2	M0	IIIA	IIIA	R1	1	34.2333	0	34.2333	1	34.2333	0	34.2333	non-tumor
187	m	78.0528	50	pT2a	pT2b	pN0	M0	IB	IIA	R0	1	43.4	1	43.4	1	43.4	1	43.4	tumor
188	m	65.2889	50	pT2a	pT2b	pN2	M0	IIIA	IIIA	R0
189	m	81.3194	50	pT2a	pT2b	pN1	M0	IIA	IIB	R0	1	1.2			1	1.2	0	1.2	Operation-associated
190	m	79.1444	50	pT2a	pT2b	pN0	M0	IB	IIA	R0	0	74.5	1	51.3	1	51.3	0	74.5
191	m	82.3917	50	pT2a	pT2b	pN1	M0	IIA	IIB	R0
192	f	56.1278	50	pT2a	pT2b	pN0	M0	IB	IIA	R0	0	42.3333	0	42.3333	0	42.3333	0	42.3333
193	m	78.0083	55	pT2a	pT2b	pN1	M0	IIA	IIB	R0	0	10.5	1	10.5	1	10.5		10.5
194	m	72.1306	12	pT2b	pT3	pN1	M0	IIB	IIIA	R0	0	34.4667	0	34.4667	0	34.4667	0	34.4667
195	m	73.1639	52	pT2b	pT3	pN0	M0	IIA	IIB	R0	1	25.1667			1	25.1667	0	25.1667	unknown
196	m	60.4444	52	pT2b	pT3	pN0	M0	IIA	IIB	R0	0	20.7			0	20.7	0	20.7
197	m	79.4806	55	pT2b	pT3	pN0	M0	IIA	IIB	R1	1	19.5667			1	19.5667	0	19.5667	unknown
198	m	63.4278	55	pT2b	pT3	pN0	M0	IIA	IIB	R0
199	m	76.0472	55	pT2b	pT3	pN0	M0	IIA	IIB	R0
200	f	75.1333	55	pT2b	pT3	pN2	M0	IIIA	IIIB	R0	1	120.367			1	120.367	0	120.367	unknown
201	m	76.4167	55	pT2b	pT3	pN2	M0	IIIA	IIIB	R0	1	1.2	0	1.2	1	1.2	0	1.2	non-tumor
202	m	43.1972	55	pT2b	pT3	pN1	M0	IIB	IIIA	R0	0	133.5	0	133.5	0	133.5	0	133.5
203	m	68.2056	55	pT2b	pT3	pN0	M0	IIA	IIB	R0	0	117.067	0	117.067	0	117.067	0	117.067
204	m	69.2528	55	pT2b	pT3	pN2	M0	IIIA	IIIB	R0	1	43.2667	0	43.2667	1	43.2667	0	43.2667	non-tumor
205	m	57.6972	55	pT2b	pT3	pN0	M0	IIA	IIB	R0	0	22.3	0	22.3	0	22.3	0	22.3
206	m	62.2694	55	pT2b	pT3	pN1	M0	IIB	IIIA	R0	0	108.467	0	108.467	0	108.467	0	108.467
207	f	80.6722	55	pT2b	pT3	pN0	M0	IIA	IIB	R0	1	92.0667			1	92.0667	0	92.0667	unknown
208	m	64.1083	55	pT2b	pT3	pN0	M0	IIA	IIB	R0	0	68.5	0	68.5	0	68.5	0	68.5
209	m	59.6444	55	pT2b	pT3	pN1	M0	IIB	IIIA	R1	1	1.36667			1	1.36667	0	1.36667	Operation-associated
210	m	64.5472	57	pT2b	pT3	pN2	M0	IIIA	IIIB	R1	1	21.7667	1	10.0333	1	10.0333	1	21.7667	tumor
211	m	66.9083	57	pT2b	pT3	pN0	M0	IIA	IIB	R0	0	28.2	1	15.1333	1	15.1333	0	28.2
212	m	77.0278	58	pT2b	pT3	pN1	M0	IIB	IIIA	R0
213	m	54.6306	59	pT2b	pT3	pN1	M0	IIB	IIIA	R0	0	71.8667			0	71.8667	0	71.8667
214	m	43.625	60	pT2b	pT3	pN1	M0	IIB	IIIA	R0
215	m	53.0389	60	pT2b	pT3	pN1	M0	IIB	IIIA	R0	1	194.033			1	194.033	0	194.033	unknown
216	m	75.2694	60	pT2b	pT3	pN2	M0	IIIA	IIIB	R0
217	m	74.7611	60	pT2b	pT3	pN1	M0	IIB	IIIA	R0
218	m	60.6611	60	pT2b	pT3	pN1	M0	IIB	IIIA	R0	0	177.967	0	177.967	0	177.967		177.967
219	m	75.7889	60	pT2b	pT3	pN2	M0	IIIA	IIIB	R0	0	0.3			0	0.3		0.3
220	m	71.7556	60	pT2b	pT3	pN0	M0	IIA	IIB	R0
221	m	71.6417	60	pT2b	pT3	pN0	M0	IIA	IIB	R0	1	16.7	0	16.7	1	16.7	0	16.7	non-tumor
222	m	79.0972	60	pT2b	pT3	pN2	M0	IIIA	IIIB	R0
223	m	72.5444	60	pT2b	pT3	pN0	M0	IIA	IIB	R0	1	66.1667	0	66.1667	1	66.1667	0	66.1667	non-tumor
224	m	63.0028	60	pT2b	pT3	pN0	M0	IIA	IIB	R0	1	55.2667	0	55.2667	1	55.2667	0	55.2667	non-tumor
225	m	84.9194	60	pT2b	pT3	pN1	M0	IIB	IIIA	R0	1	67.2	0	67.2	1	67.2	0	67.2	non-tumor
226	m	59.725	60	pT2b	pT3	pN1	M0	IIB	IIIA	R0	0	116.467	0	116.467	0	116.467	0	116.467
227	m	76.9167	60	pT2b	pT3	pN2	M0	IIIA	IIIB	R0
228	m	67.2167	60	pT2b	pT3	pN1	M0	IIB	IIIA	R0	0	97.3	0	97.3	0	97.3	0	97.3
229	f	58.4417	60	pT2b	pT3	pN0	M0	IIA	IIB	R0
230	m	53.1778	60	pT2b	pT3	pN1	M0	IIB	IIIA	R0	0	77.6	0	77.6	0	77.6	0	77.6
231	m	61.9833	60	pT2b	pT3	pN0	M0	IIA	IIB	R0	1	33.7	0	33.7	1	33.7	0	33.7	non-tumor
232	f	64.25	62	pT2b	pT3	pN1	M0	IIB	IIIA	R0	0	53.6667	0	53.6667	0	53.6667	0	53.6667
233	f	66.3694	62	pT2b	pT3	pN0	M0	IIA	IIB	R0	0	51.1667	0	51.1667	0	51.1667	0	51.1667
234	f	78.325	63	pT2b	pT3	pN0	M0	IIA	IIB	R0	0	49.2333	0	49.2333	0	49.2333	0	49.2333
235	m	67.7889	65	pT2b	pT3	pN1	M0	IIB	IIIA	R0	1	9.56667	1	8.8	1	8.8	0	9.56667	non-tumor
236	m	62.8778	65	pT2b	pT3	pN0	M0	IIA	IIB	R0	1	24.4667	1	8.76667	1	8.76667	1	24.4667	tumor
237	m	60.4722	65	pT2b	pT3	pN1	M0	IIB	IIIA	R0	1	66.5667	0	66.5667	1	66.5667	0	66.5667	non-tumor
238	m	70.3222	65	pT2b	pT3	pN2	M0	IIIA	IIIB	R0	1	35.3333	0	35.3333	1	35.3333	0	35.3333	non-tumor
239	f	73.0333	65	pT2b	pT3	pN1	M0	IIB	IIIA	R0	0	42.2	0	42.2	0	42.2	0	42.2
240	m	60.8417	66	pT2b	pT3	pN0	M0	IIA	IIB	R0	0	59.4667	1	58.8333	1	58.8333	0	59.4667
241	f	62.1417	68	pT2b	pT3	pN0	M0	IIA	IIB	R0	0	40.8333	0	40.8333	0	40.8333	0	40.8333
242	m	75.7111	70	pT2b	pT3	pN0	M0	IIA	IIB	R0
243	m	84.025	70	pT2b	pT3	pN0	M0	IIA	IIB	R0
244	m	78.8389	70	pT2b	pT3	pN0	M0	IIA	IIB	R0	1	100.833	0	100.833	1	100.833	0	100.833	non-tumor
245	m	75.3111	70	pT2b	pT3	pN1	M0	IIB	IIIA	R0	1	36.5667	0	36.5667	1	36.5667	0	36.5667	non-tumor
246	m	72.4528	70	pT2b	pT3	pN0	M0	IIA	IIB	R0	1	17.9	1	8.63333	1	8.63333	1	17.9	tumor
247	f	71.7417	70	pT2b	pT3	pN1	M0	IIB	IIIA	R0	1	88.5	1	87.7333	1	87.7333	1	88.5	tumor
248	m	76.4	15	pT3	pT2a	pN0	M0	IIB	IB	R0
249	m	55.9944	30	pT3	pT2a	pN1	M0	IIIA	IIB	R1	0	14.5667	0	14.5667	0	14.5667	0	14.5667
250	m	47.1278	35	pT3	pT2a	pN0	M0	IIB	IB	R0	0	85.4	0	85.4	0	85.4	0	85.4
251	m	68.9528	40	pT3	pT2a	pN1	M0	IIIA	IIB	R0	1	40.6333	1	21.4333	1	21.4333	0	40.6333	non-tumor
252	f	61.8194	45	pT3	pT2b	pN1	M0	IIIA	IIB	R0	1	114.333	1	114.033	1	114.033	1	114.333	tumor
253	m	62.4333	45	pT3	pT2b	pN1	M0	IIIA	IIB	R0
254	m	66.0167	45	pT3	pT2b	pN0	M0	IIB	IIA	R0	1	17.8667	1	9.83333	1	9.83333	1	17.8667	tumor
255	m	65.1806	50	pT3	pT2b	pN2	M0	IIIA	IIIA	R0	0	108.967	0	108.967	0	108.967	0	108.967
256	m	69.4722	9	pT3	pT3	pN0	M0	IIB	IIB	R0	0	38.4333	0	38.4333	0	38.4333	0	38.4333
257	m	56.0806	30	pT3	pT3	pN2	M0	IIIA	IIIB	R1	0	145.367	0	145.367	0	145.367	0	145.367
258	m	77.1861	30	pT3	pT3	pN0	M0	IIB	IIB	R0	1	117.433	0	117.433	1	117.433	0	117.433	unknown
259	m	64.3861	32	pT3	pT3	pN1	M0	IIIA	IIIA	R1	0	157.267	0	157.267	0	157.267	0	157.267
260	m	63.9222	35	pT3	pT3	pN2	M0	IIIA	IIIB	R1	1	94.5667	0	94.5667	1	94.5667	0	94.5667	non-tumor
261	m	73.0389	35	pT3	pT3	pN1	M0	IIIA	IIIA	R1	1	14.6667	1	13.0333	1	13.0333	1	14.6667	tumor
262	m	65.8361	43	pT3	pT3	pN0	M0	IIB	IIB	R0	1	56.9	0	56.9	1	56.9	0	56.9	non-tumor
263	m	68.75	44	pT3	pT3	pN0	M0	IIB	IIB	R0	1	31.6333	1	5.1	1	5.1	1	31.6333	tumor
264	m	53.6222	44	pT3	pT3	pN0	M0	IIB	IIB	R1	1	0.133333			1	0.133333	0	0.133333	Operation-associated
265	m	69.1222	45	pT3	pT3	pN1	M0	IIIA	IIIA	R1
266	m	66.8556	45	pT3	pT3	pN0	M0	IIB	IIB	R0	0	98.9			0	98.9	0	98.9
267	m	59.7806	46	pT3	pT3	pN0	M0	IIB	IIB	R0	1	8.46667	1	7.5	1	7.5	1	8.46667	tumor
268	m	76.7611	50	pT3	pT3	pN2	M0	IIIA	IIIB	R0	1	3.63333	0	3.63333	1	3.63333	0	3.63333	non-tumor
269	m	79.1361	50	pT3	pT3	pN1	M0	IIIA	IIIA	R1	1	13.7667			1	13.7667	0	13.7667	Operation-associated
270	m	62.0139	50	pT3	pT3	pN0	M0	IIB	IIB	R0	1	41	0	41	1	41	0	41	non-tumor
271	m	68.5306	60	pT3	pT3	pN2	M0	IIIA	IIIB	R1
272	m	71.85	60	pT3	pT3	pN0	M0	IIB	IIB	R0	1	78.2333			1	78.2333	0	78.2333	unknown
273	m	72.3806	60	pT3	pT3	pN0	M0	IIB	IIB	R0	1	130.733	1	19.3	1	19.3	0	130.733	unknown
274	m	52.3111	60	pT3	pT3	pN1	M0	IIIA	IIIA	R1	1	20.5	1	19.1333	1	19.1333	1	20.5	tumor
275	m	67.5333	60	pT3	pT3	pN2	M0	IIIA	IIIB	R1
276	f	78.1278	65	pT3	pT3	pN0	M0	IIB	IIB	R0	1	76.4	0	76.4	1	76.4	0	76.4	non-tumor
277	f	76.6722	65	pT3	pT3	pN0	M0	IIB	IIB	R0
278	m	58.3583	65	pT3	pT3	pN2	M0	IIIA	IIIB	R1	0	79.8	0	79.8	0	79.8	0	79.8
279	m	72.1083	70	pT3	pT3	pN0	M0	IIB	IIB	R0
280	f	56.6417	70	pT3	pT3	pN0	M0	IIB	IIB	R1	0	11.7667	1	11.7667	1	11.7667	0	11.7667
281	m	60.325	70	pT3	pT3	pN0	M0	IIB	IIB	R0	1	84.1667	0	84.1667	1	84.1667	0	84.1667	non-tumor
282	f	62.5222	70	pT3	pT3	pN2	M0	IIIA	IIIB	R0	0	58.5
283	f	67.75	70	pT3	pT4	pN1	M0	IIIA	IIIA	R0
284	m	77.8333	73	pT3	pT4	pN1	M0	IIIA	IIIA	R1	1	2.96667			1	2.96667	0	2.96667	Operation-associated
285	m	64.675	75	pT3	pT4	pN0	M0	IIB	IIIA	R0	1	101.267	1	101.167	1	101.167	1	101.267	tumor
286	m	72.6583	75	pT3	pT4	pN0	M0	IIB	IIIA	R0	0	13.7333	1	13.5333	1	13.5333	0	13.7333
287	m	56.2056	75	pT3	pT4	pN1	M0	IIIA	IIIA	R0	1	49.3	0	49.3	1	49.3	0	49.3	non-tumor
288	m	62.6611	75	pT3	pT4	pN0	M0	IIB	IIIA	R0	0	22.2667			0	22.2667	0	22.2667
289	m	68.7611	75	pT3	pT4	pN0	M0	IIB	IIIA	R0	0	103.2	0	103.2	0	103.2	0	103.2
290	f	59.5056	75	pT3	pT4	pN0	M0	IIB	IIIA	R0	1	59.5	0	59.5	1	59.5	0	59.5	non-tumor
291	m	75.9222	75	pT3	pT4	pN1	M0	IIIA	IIIA	R0	1	18.1	1	7.2	1	7.2	1	18.1	tumor
292	m	74.6528	80	pT3	pT4	pN2	M0	IIIA	IIIB	R0
293	m	81.4444	80	pT3	pT4	pN1	M1	IV	IVA	R1	1	17.9667			1	17.9667	1	17.9667	tumor
294	m	63.9806	80	pT3	pT4	pN1	M0	IIIA	IIIA	R1	1	73.5	1	60.1667	1	60.1667	1	73.5	tumor
295	m	68.7861	80	pT3	pT4	pN1	M0	IIIA	IIIA	R1	0	1.83333	1	1.26667	1	1.26667	0	1.83333
296	m	64.4333	80	pT3	pT4	pN0	M0	IIB	IIIA	R0	0	102.533	0	102.533	0	102.533	0	102.533
297	m	73.4056	80	pT3	pT4	pN1	M0	IIIA	IIIA	R0
298	m	80.8111	80	pT3	pT4	pN0	M1	IV	IVB	R1	1	3.33333			1	3.33333	0	3.33333	non-tumor
299	m	61.0944	80	pT3	pT4	pN0	M0	IIB	IIIA	R0	0	65.1	0	65.1	0	65.1	0	65.1
300	m	64.1889	85	pT3	pT4	pN2	M0	IIIA	IIIB	R0
301	m	73.9917	87	pT3	pT4	pN1	M0	IIIA	IIIA	R0	1	7.33333	1	7.33333	1	7.33333	1	7.33333	tumor
302	m	59.2806	88	pT3	pT4	pN2	M1	IV	IVB	R1	1	52.1333	1	20.4333	1	20.4333	1	52.1333	tumor
303	m	71.8167	90	pT3	pT4	pN0	M0	IIB	IIIA	R0	1	56.3333	1	44.5667	1	44.5667	1	56.3333	tumor
304	m	75.5139	90	pT3	pT4	pN2	M0	IIIA	IIIB	R0
305	m	65.6861	90	pT3	pT4	pN0	M0	IIB	IIIA	R0
306	m	64.1139	90	pT3	pT4	pN1	M0	IIIA	IIIA	R0
307	m	78.6167	90	pT3	pT4	pN1	M0	IIIA	IIIA	R0
308	m	57.375	90	pT3	pT4	pN1	M1	IV	IVA	R0	1	9.76667	1	2.16667	1	2.16667	1	9.76667	tumor
309	m	59.1528	90	pT3	pT4	pN1	M0	IIIA	IIIA	R2	1	3.03333			1	3.03333	0	3.03333	unknown
310	m	82.2972	90	pT3	pT4	pN1	M0	IIIA	IIIA	R0	0	89.4333	0	89.4333	0	89.4333	0	89.4333
311	f	68.0111	90	pT3	pT4	pN2	M0	IIIA	IIIB	R0	0	5.4	1	5.4	1	5.4	0	5.4
312	m	55.2722	90	pT3	pT4	pN0	M0	IIB	IIIA	R0	0	65.3333	0	65.3333	0	65.3333	0	65.3333
313	m	69.4583	95	pT3	pT4	pN0	M1	IV	IVB	R1
314	m	59.325	95	pT3	pT4	pN1	M0	IIIA	IIIA	R0	1	72.1333	1	72.1333	1	72.1333	1	72.1333	tumor
315	m	72.1667	98	pT3	pT4	pN0	M0	IIB	IIIA	R0	1	33.4333	1	17.6667	1	17.6667	1	33.4333	tumor
316	m	64.1861	100	pT3	pT4	pN0	M0	IIB	IIIA	R0
317	m	61.5333	100	pT3	pT4	pN0	M0	IIB	IIIA	R0
318	m	78.4361	100	pT3	pT4	pN1	M0	IIIA	IIIA	R0	1	5.16667	0	5.16667	1	5.16667	0	5.16667	non-tumor
319	m	75.1389	100	pT3	pT4	pN1	M0	IIIA	IIIA	R0	0	68.1667	0	68.1667	0	68.1667	0	68.1667
320	m	67.8528	105	pT3	pT4	pN0	M0	IIB	IIIA	R0	1	64.2667	0	64.2667	1	64.2667	0	64.2667	non-tumor
321	m	76.8028	110	pT3	pT4	pN1	M0	IIIA	IIIA	R0	1	7.06667	1	6.3	1	6.3	1	7.06667	tumor
322	m	76.2556	110	pT3	pT4	pN1	M0	IIIA	IIIA	R0	1	13.3	1	12.1	1	12.1	1	13.3	tumor
323	m	75.0139	120	pT3	pT4	pN0	M0	IIB	IIIA	R0
324	m	68.2944	120	pT3	pT4	pN1	M0	IIIA	IIIA	R0	1	10.3333	1	6.7	1	6.7	1	10.3333	tumor
325	f	56.7722	120	pT3	pT4	pN1	M0	IIIA	IIIA	R0	0	59.1	0	59.1	0	59.1	0	59.1
326	m	64.5083	130	pT3	pT4	pN1	M0	IIIA	IIIA	R1	1	6.9			1	6.9	1	6.9	tumor
327	m	75.0111	150	pT3	pT4	pN1	M0	IIIA	IIIA	R0
328	m	63.6694	17	pT4	pT4	pN0	M1	IV	IVA	R0	0	23.4333	1	18.4333	1	18.4333	0	23.4333
329	m	67.2	18	pT4	pT4	pN2	M0	IIIB	IIIB	R0
330	m	67.4556	25	pT4	pT4	pN1	M0	IIIA	IIIA	R0	0	18.6	1	11.9333	1	11.9333	0	18.6
331	m	73.6639	30	pT4	pT4	pN2	M0	IIIB	IIIB	R0	1	93.4667	1	9.33333	1	9.33333	1	93.4667	tumor
332	m	58.0472	32	pT4	pT4	pN2	M0	IIIB	IIIB	R1	1	8	1	4.3	1	4.3	1	8	tumor
333	m	44.6861	35	pT4	pT4	pN1	M1	IV	IVA	R0
334	m	75.8278	35	pT4	pT4	pN1	M0	IIIA	IIIA	R1
335	m	72.2361	40	pT4	pT4	pN0	M0	IIIA	IIIA	R0
336	m	66.3361	50	pT4	pT4	pN2	M0	IIIB	IIIB	R1	1	26.2667	1	15.8667	1	15.8667	1	26.2667	tumor
337	m	65.5333	50	pT4	pT4	pN0	M1	IV	IVA	R1	0	6.83333	1	6.83333	1	6.83333		6.83333
338	f	76.3167	50	pT4	pT4	pN0	M0	IIIA	IIIA	R0	0	44
339	m	80.5361	55	pT4	pT4	pN0	M0	IIIA	IIIA	R1	1	24.5	1	14.4	1	14.4	1	24.5	tumor
340	m	74.4556	55	pT4	pT4	pN1	M0	IIIA	IIIA	R1	1	19.7333	1	12.3667	1	12.3667	1	19.7333	tumor
341	m	71.6528	60	pT4	pT4	pN0	M0	IIIA	IIIA	R0	0	33.1333			0	33.1333		33.1333
342	m	68.7583	60	pT4	pT4	pN0	M0	IIIA	IIIA	R0	1	22.4667	1	8.46667	1	8.46667	1	22.4667	tumor
343	m	68.2583	60	pT4	pT4	pN1	M0	IIIA	IIIA	R0	1	15.9667	0	15.9667	1	15.9667	0	15.9667	non-tumor
344	m	71.2556	60	pT4	pT4	pN1	M0	IIIA	IIIA	R1	0	71.4	0	71.4	0	71.4	0	71.4
345	f	45.9556	65	pT4	pT4	pN0	M0	IIIA	IIIA	R2	1	7.9			1	7.9	1	7.9	tumor
346	m	74.9556	68	pT4	pT4	pN2	M0	IIIB	IIIB	R0
347	m	73.1667	70	pT4	pT4	pN1	M0	IIIA	IIIA	R1	1	12.6	1	8.5	1	8.5	1	12.6	tumor
348	m	70.9806	70	pT4	pT4	pN1	M0	IIIA	IIIA	R1	1	99.2	0	99.2	1	99.2	0	99.2	non-tumor
349	m	73.1611	70	pT4	pT4	pN1	M0	IIIA	IIIA	R1	1	112.067			1	112.067	0	112.067	unknown
350	m	75.7972	70	pT4	pT4	pN2	M0	IIIB	IIIB	R0	1	9.36667	1	9.36667	1	9.36667	1	9.36667	tumor
351	m	66.2972	90	pT4	pT4	pN1	M0	IIIA	IIIA	R0
352	m	68.7028	90	pT4	pT4	pN2	M0	IIIB	IIIB	R2	1	6.76667	1	3.13333	1	3.13333	1	6.76667	tumor
353	m	51.7333	120	pT4	pT4	pN1	M0	IIIA	IIIA	R0	1	27.8667	0	27.8667	1	27.8667	0	27.8667	non-tumor
354	m	72.4278	145	pT4	pT4	pN1	M0	IIIA	IIIA	R1
